# Supplementary material
Source: MDPI journal article supplement (https://www.mdpi.com/2311-5637/9/8/752)
Supplement: s1 [file s1]

# Removal of Quinolone Antibiotics from Wastewater by the Biochar-Based Sludge Adsorbent

Yaoyu Zhang <sup>1' 2</sup>, Yiwei Gong <sup>2' 3</sup>, Gang Shi <sup>2</sup>, Xiping Liu <sup>2</sup>, Maifan Dai <sup>2' 4</sup> and Lingyun Ding <sup>1, \*</sup>

1 College of Health Science and Environmental Engineering, Shenzhen Technology University, Shenzhen 518118, China; yaoyuzhang@pku.edu.cn

2 Key Laboratory for Heavy Metal Pollution Control and Reutilization, School of Environment and Energy, Peking University Shenzhen Graduate School, Shenzhen 518055, China

3 Institute for Organic Chemistry, RWTH Aachen University, Landoltweg 1, 52074 Aachen, Germany

4 Fujian Mintou Carbon Asset Investment Co., Ltd., Fuzhou 350000, China

\* Correspondence: dinglingyun@pku.edu.cn

**Table S1.** The main components in the secondary treatment wastewater used in this study

| <b>Parameters</b> | <b>Average<br/>Concentration<br/>(mg·L<sup>-1</sup>)</b> | <b>Main intervals<br/>(mg·L<sup>-1</sup>)</b> | <b>Discharge<br/>standard</b> |
|-------------------|----------------------------------------------------------|-----------------------------------------------|-------------------------------|
| COD               | 76                                                       | 58-82                                         | 100                           |
| TP                | 0.029                                                    | 0.022-0.034                                   | 3                             |
| TN                | 7.289                                                    | 7.153-7.561                                   | /                             |
| TOC               | 20.98                                                    | 20.91-21.05                                   | 30                            |

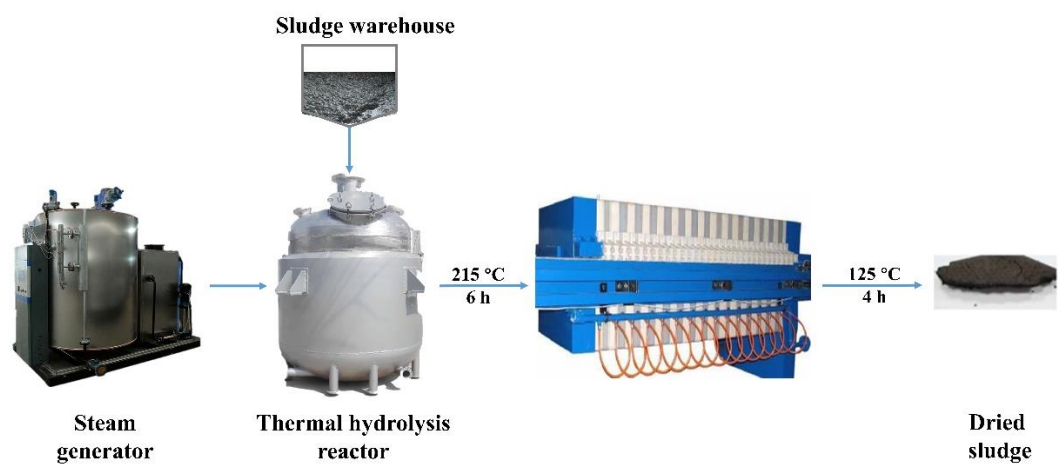

**Figure S1.** The flow chart of thermal hydrolysis of excess sludge from a MWTP.

**Text S1.** Several modifiers were used to improve RBA performance, as shown in Figure S2 (a). In general, the removal efficiency of NOR significantly improved by 21.0-62.7% after modification. A lower concentration of acid solution showed higher modification performance. Figure S2 (b) shows the XRD of different adsorbents. Usually, the raw materials of the adsorbent and the processing method can affect the type and structure of the substances in the adsorbent. By comparing with PDF cards, the peaks at  $2\theta=26.82^\circ$ ,  $38.90^\circ$ ,  $57.37^\circ$  and  $67.96^\circ$  matched with quartz ( $\text{SiO}_2$ , PDF#46-1045) and the peak at  $2\theta=12.35^\circ$  matched with kaolin ( $\text{Al}_2\text{Si}_2\text{O}_5(\text{OH})_4$ , PDF#79-1570), suggesting that the main inorganic components in RBA were quartz and kaolin.

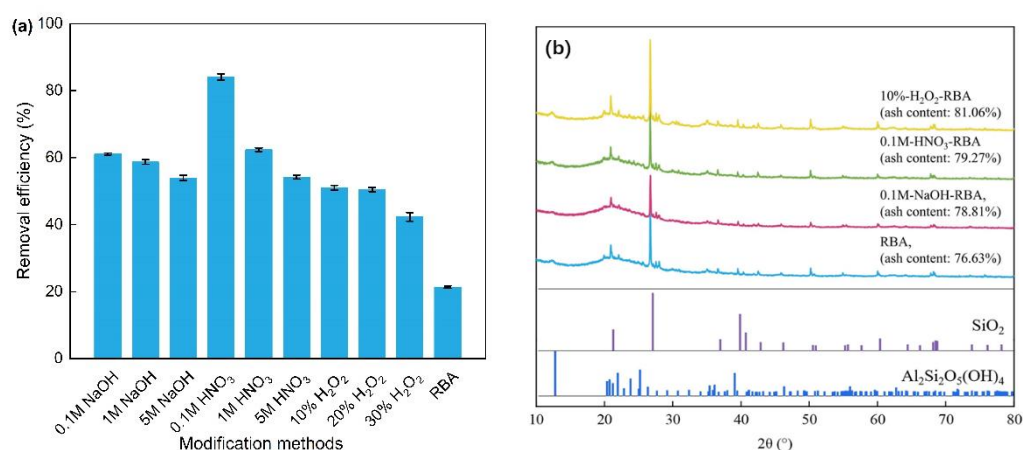

**Figure S2.** The (a) antibiotic removal efficiency and (b) XRD of RBA with different modification methods.
